# Supplementary material for: Safety, Efficacy, and Biomarker Analysis of Toripalimab in Previously Treated Advanced Melanoma: Results of the POLARIS-01 Multicenter Phase II Trial
Source: Oxford University Press journal article supplement (doi:10.1158/1078-0432.ccr-19-3922), 2020-04-22
Supplement: 10780432ccr193922-sup-233272_5_supp_6187027_q7t10b.docx [file 10780432ccr193922-sup-233272_5_supp_6187027_q7t10b.docx]

**Supplemental Table 1.** Grade 3 and above treatment-related adverse events in the study. AST, Aspartate transaminase.

| N (%) | All | Grade 3 | Grade 4 | Grade 5 |
| --- | --- | --- | --- | --- |
| All Grade 3 and above | 25 (19.5) | 13 (10.2) | 12 (9.4) | 0 |
| Amylase increased | 5 (3.9) | 2 (1.6) | 3 (2.3) | 0 |
| Creatine kinase increased | 4 (3.1) | 2 (1.6) | 2 (1.6) | 0 |
| Lipase increased | 4 (3.1) | 2 (1.6) | 2 (1.6) | 0 |
| Hypertriglyceridemia | 3 (2.3) | 2 (1.6) | 1 (0.8) | 0 |
| Liver injury | 2 (1.6) | 0 | 2 (1.6) | 0 |
| Hyponatremia | 2 (1.6) | 2 (1.6) | 0 | 0 |
| Thrombocytopenia | 2 (1.6) | 0 | 2 (1.6) | 0 |
| Hypochloremia | 2 (1.6) | 2 (1.6) | 0 | 0 |
| Hyperglycemia | 2 (1.6) | 1 (0.8) | 1 (0.8) | 0 |
| Elevated liver transaminase | 1 (0.8) | 0 | 1 (0.8) | 0 |
| Uveitis | 1 (0.8) | 1 (0.8) | 0 | 0 |
| AST increased | 1 (0.8) | 1 (0.8) | 0 | 0 |
| Interstitial lung disease | 1 (0.8) | 1 (0.8) | 0 | 0 |
| Neutropenia | 1 (0.8) | 1 (0.8) | 0 | 0 |
| Urine ketone present | 1 (0.8) | 0 | 1 (0.8) | 0 |
| Hypokalemia | 1 (0.8) | 1 (0.8) | 0 | 0 |
| Cortisol levels decreased | 1 (0.8) | 1 (0.8) | 0 | 0 |
